# Supplementary material for: Investigating the Impact of Asp181 Point Mutations on Interactions between PTP1B and Phosphotyrosine Substrate
Source: PubMed Central journal article supplement (PMC4035576; doi:10.1038/srep05095), 2014-05-28
Supplement: srep05095-s1.pdf [file srep05095-s1.pdf]

## Supplementary information

### **Investigating the Impact of Asp181 Point Mutations on Interactions between PTP1B and Phosphotyrosine Substrate**

Mengyuan Liu <sup>1</sup>, Lushan Wang <sup>2</sup>, Xun Sun <sup>1, \*</sup>, Xian Zhao <sup>1, \*</sup>

<sup>1</sup> State Key Laboratory of Crystal Materials, Shandong University, Jinan 250100, China,

<sup>2</sup> State Key Laboratory of Microbial Technology, Shandong University, Jinan 250100, China.

Correspondence and requests for materials should be addressed to X. S. (sunxun@icm.sdu.edu.cn)  
and X. Z. (zhaoxian@icm.sdu.edu.cn)

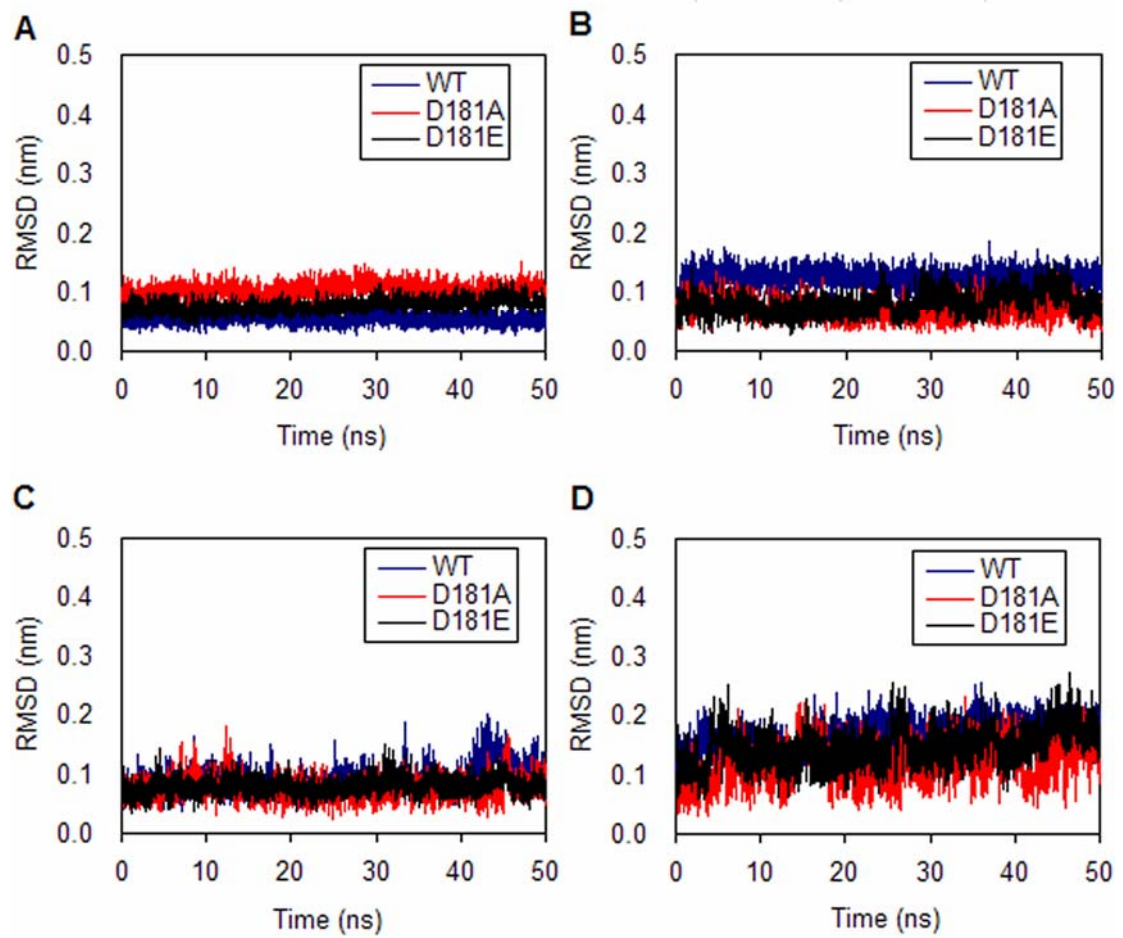

**Figure S1 | Comparison of RMSD values in different regions.** (A) P loop. (B) WPD loop. (C) Secondary aryl-phosphate-binding site. (D) Other residues in the active site of PTP1B.



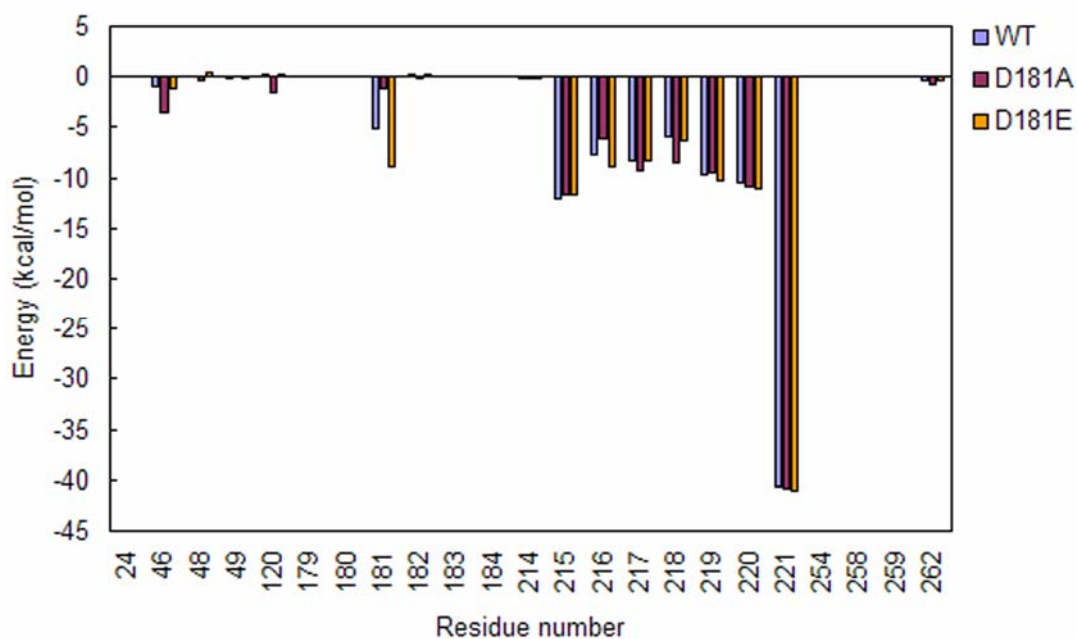

**Figure S2 | The average of electrostatic interaction energies between substrate and residues in the active site of PTP1B.**

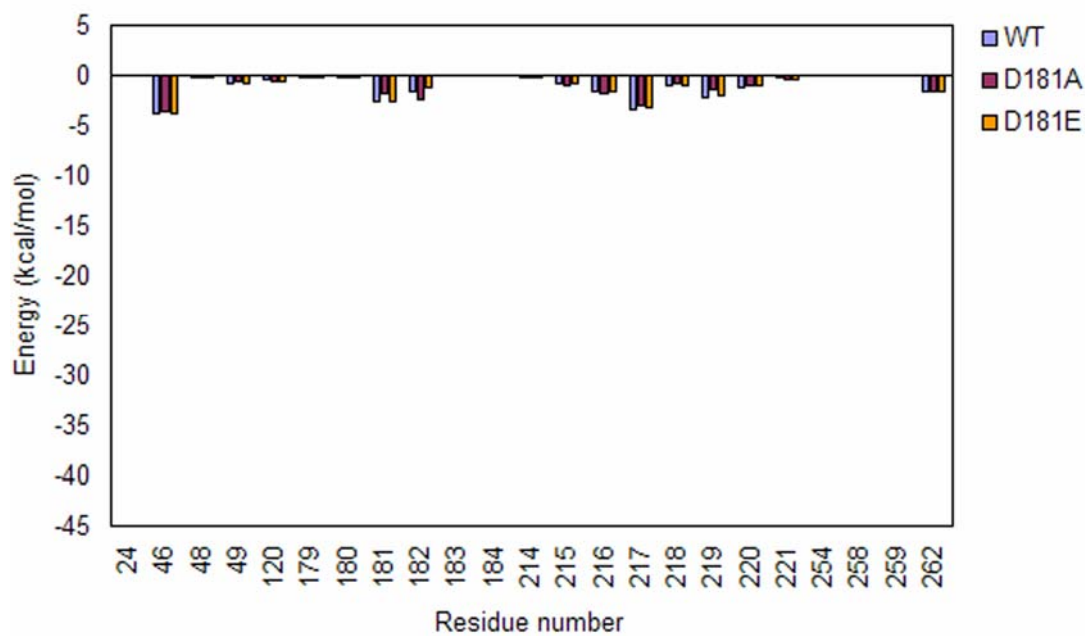

**Figure S3 | The average of van der Waals interaction energies between substrate and residues in the active site of PTP1B.**
